# Supplementary material for: Inflammatory Profile Assessment in a Highly Selected Athyreotic Population Undergoing Controlled and Standardized Hypothyroidism
Source: MDPI journal article supplement (doi:10.3390/biomedicines12010239), 2024-01-22
Supplement: s1 [file s1]

| Mann Whitney U-test |      | P     |
|---------------------|------|-------|
| WBC_sosp            | 1621 | 0.029 |
| PLT_sosp            | 1639 | 0.025 |
| Neu_sosp            | 1486 | 0.005 |
| Linf_sosp           | 1997 | 0.623 |
| Mon_sosp            | 1527 | 0.007 |
| Eosinofili_sosp     | 1679 | 0.060 |
| Basofili_sosp       | 1937 | 0.357 |

**Table S1.** Mann Whitney U-test of White blood cells and Platelets according to sex in total sample.

| Mann Whitney U-test |      | P      |
|---------------------|------|--------|
| NLR                 | 1361 | < .001 |
| PLR                 | 1963 | 0.519  |
| MLR                 | 1269 | < .001 |
| SII                 | 1711 | 0.077  |
| SIRI                | 1229 | < .001 |
| AISI                | 1478 | 0.005  |

**Table S2.** Mann Whitney U-test of BIIXs according to sex in total sample.

| Kruskal-Wallis |          |     |       |              |
|----------------|----------|-----|-------|--------------|
|                | $\chi^2$ | Gdl | P     | $\epsilon^2$ |
| NLR            | 6.76     | 2   | 0.034 | 0.0683       |
| PLR            | 1.64     | 2   | 0.440 | 0.0166       |
| MLR            | 3.95     | 2   | 0.139 | 0.0399       |
| SII            | 8.38     | 2   | 0.015 | 0.0846       |
| SIRI           | 11.62    | 2   | 0.003 | 0.1173       |
| AISI           | 10.55    | 2   | 0.005 | 0.1066       |

**Table S3.** Kruskal-Wallis test of BIIXs according to BMI

|      |         | Age   | TSH  | FT4  | FT3  |
|------|---------|-------|------|------|------|
| NLR  | p-value | 0.150 | 0.93 | 0.32 | 0.20 |
| PLR  | p-value | 0.623 | 0.33 | 0.37 | 0.50 |
| MLR  | p-value | 0.485 | 0.87 | 0.06 | 0.06 |
| SII  | p-value | 0.298 | 0.25 | 0.96 | 0.72 |
| SIRI | p-value | 0.212 | 0.70 | 0.13 | 0.06 |
| AISI | p-value | 0.349 | 0.27 | 0.46 | 0.10 |

**Table S4.** Correlation of BIIXs with age, TSH, FT4, and FT3 in total sample.

| Mann Whitney U-test |      | P      |
|---------------------|------|--------|
| NLR                 | 1079 | 0.005  |
| PLR                 | 1214 | 0.037  |
| MLR                 | 936  | < .001 |
| SII                 | 1235 | 0.051  |
| SIRI                | 1169 | 0.020  |
| AISI                | 1285 | 0.084  |

**Table S5** Mann Whitney U-test of BIIxs according to Thyroglobulin level in total sample.
